# Supplementary material for: smFISH in chips: a microfluidic-based pipeline to quantify in situ gene expression in whole organisms
Source: Royal Society of Chemistry journal article supplement (doi:10.1039/c9lc00896a), 2019-11-22
Supplement: c9lc00896a1.pdf [file c9lc00896a1.pdf]

## Supplemental Materials

### smFISH in chips: a microfluidic-based pipeline to quantify *in situ* gene expression in whole organisms

Jason Wan,<sup>a,c</sup> Gongchen Sun,<sup>b,c</sup> Jocelyn Dicont,<sup>b,c</sup> Dhaval S. Patel,<sup>b,c</sup> and Hang Lu<sup>\*b,c</sup>

*a. Wallace H. Coulter Department of Biomedical Engineering, Georgia Institute of Technology and Emory University, Atlanta, Georgia 30332, USA*

*b. School of Chemical & Biomolecular Engineering, Georgia Institute of Technology, Atlanta, Georgia 30332, USA*

*c. Petit Institute for Bioengineering and Bioscience, Georgia Institute of Technology, Atlanta, Georgia 30332, USA*

*\*Author to whom correspondence should be addressed. Email: hang.lu@gatech.edu*

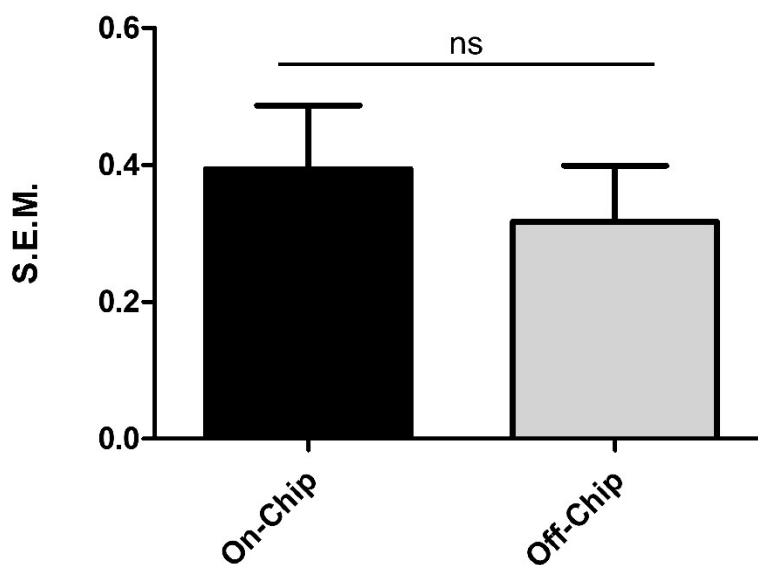

**FIG. S1.** Standard error of the mean (S.E.M.) of *gpa-3* mRNA counts is not significantly different between on- and off-chip conditions. Each group represents the mean S.E.M. of the three independent experiments, and error bars represent S.E.M. An unpaired T-test was performed. (ns, not significant).

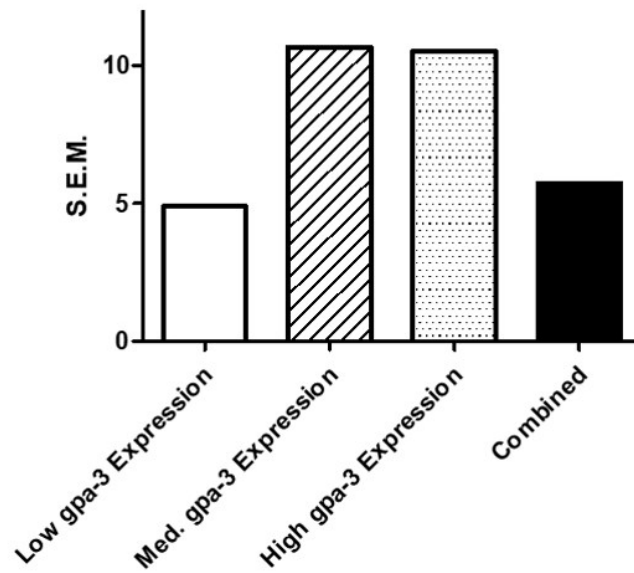

**FIG. S2.** Standard error of the mean (S.E.M.) of *Pdaf-7::Venus* expression in each population bin. S.E.M. increases as *gpa-3* expression increases, but this information is lost when considering the whole population (combined).

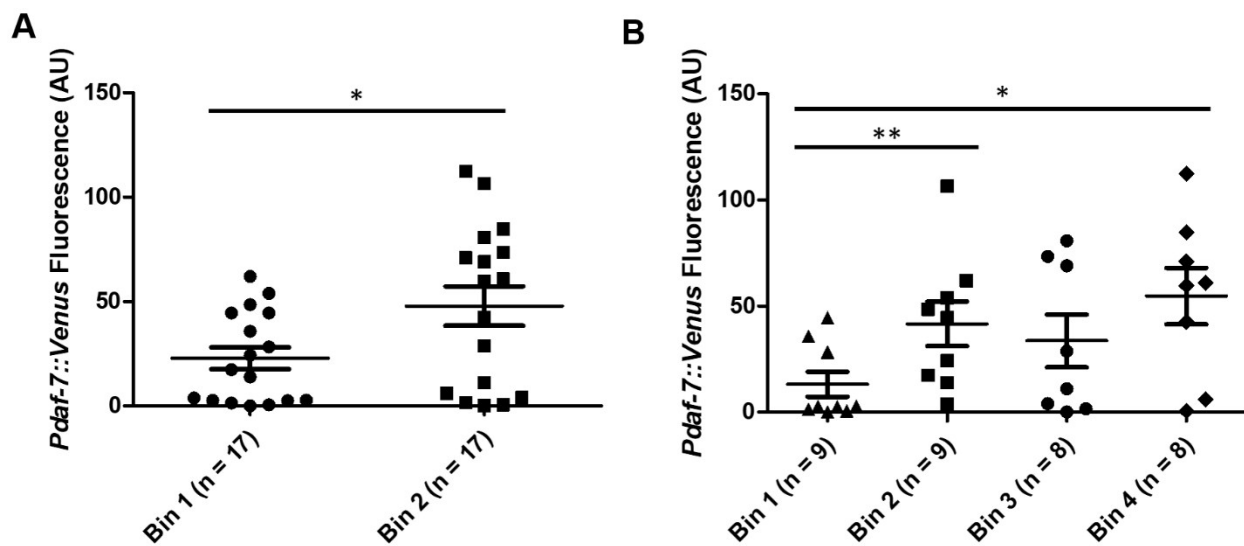

**FIG. S3.** The positive relationship between *gpa-3* and *daf-7* expression is consistent regardless of bin size. The binning is based on *gpa-3* mRNA expression. Higher *gpa-3* expression correlates with significantly higher *Pdaf-7::Venus* expression when the population is divided in (A) two bins or (B) four bins. The Mann-Whitney U test was performed. (\*\* $P < 0.01$ ; \* $P < 0.05$ )
